# Supplementary material for: Whole-genome characterization in pedigreed non-human primates using genotyping-by-sequencing (GBS) and imputation
Source: PubMed Central journal article supplement (PMC4997765; doi:10.1186/s12864-016-2966-x), 2016-08-24

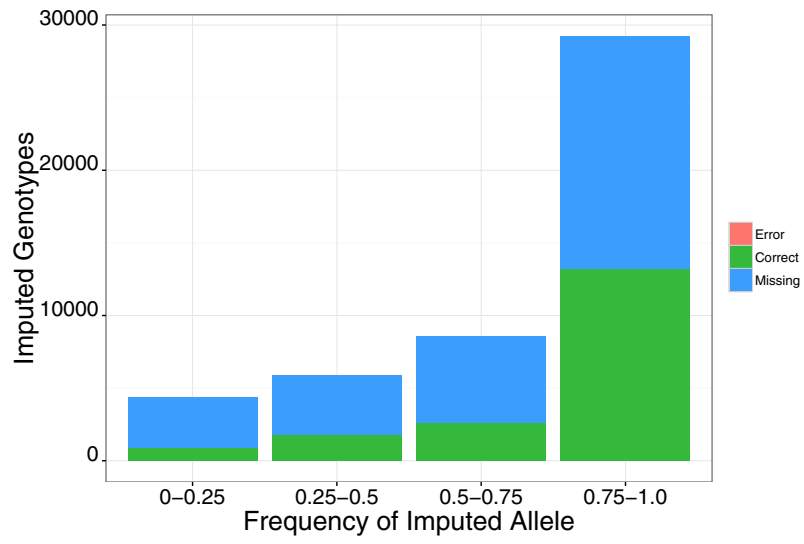

Supplement: 12864_2016_2966_MOESM1_ESM.pdf [file 12864_2016_2966_MOESM1_ESM.pdf]
